# Supplementary material
Source: PubMed Central journal article supplement (PMC5710504)
Supplement: jamaoncol-3-1386-s001.pdf [file jamaoncol-3-1386-s001.pdf]

## Supplementary Online Content

Karim S, Brennan K, Nanji S, Berry SR, Booth CM. Association between prognosis and tumor laterality in early-stage colon cancer. *JAMA Oncol*. Published online June 8, 2017. doi:10.1001/jamaoncol.2017.1016

**eFigure.** Identification of Patients With Resected Colon Cancer in Ontario During 2002-2008

**eTable 1.** Patient-Level Factors Associated With Right-Sided Colon Cancer Among Patients With Early-Stage Disease Resected in Ontario During 2002-2008 (n=6365)

**eTable 2.** Factors Associated With Right-Sided Colon Cancer Among Patients With Stage III Disease Resected in Ontario During 2002-2008 (n=2756)

**eTable 3.** Factors Associated With Survival Among Patients With Resected Colon Cancer Stage I in Ontario During 2002-2008 (n=1163)

**eTable 4.** Factors Associated With Survival Among Patients With Resected Colon Cancer Stage II in Ontario During 2002-2008 (n=2446)

**eTable 5.** Factors Associated With Survival Among Patients With Resected Colon Cancer Stage III in Ontario During 2002-2008 (n=2756)

This supplementary material has been provided by the authors to give readers additional information about their work.

**eFigure.** Identification of Patients With Resected Colon Cancer in Ontario During 2002-2008

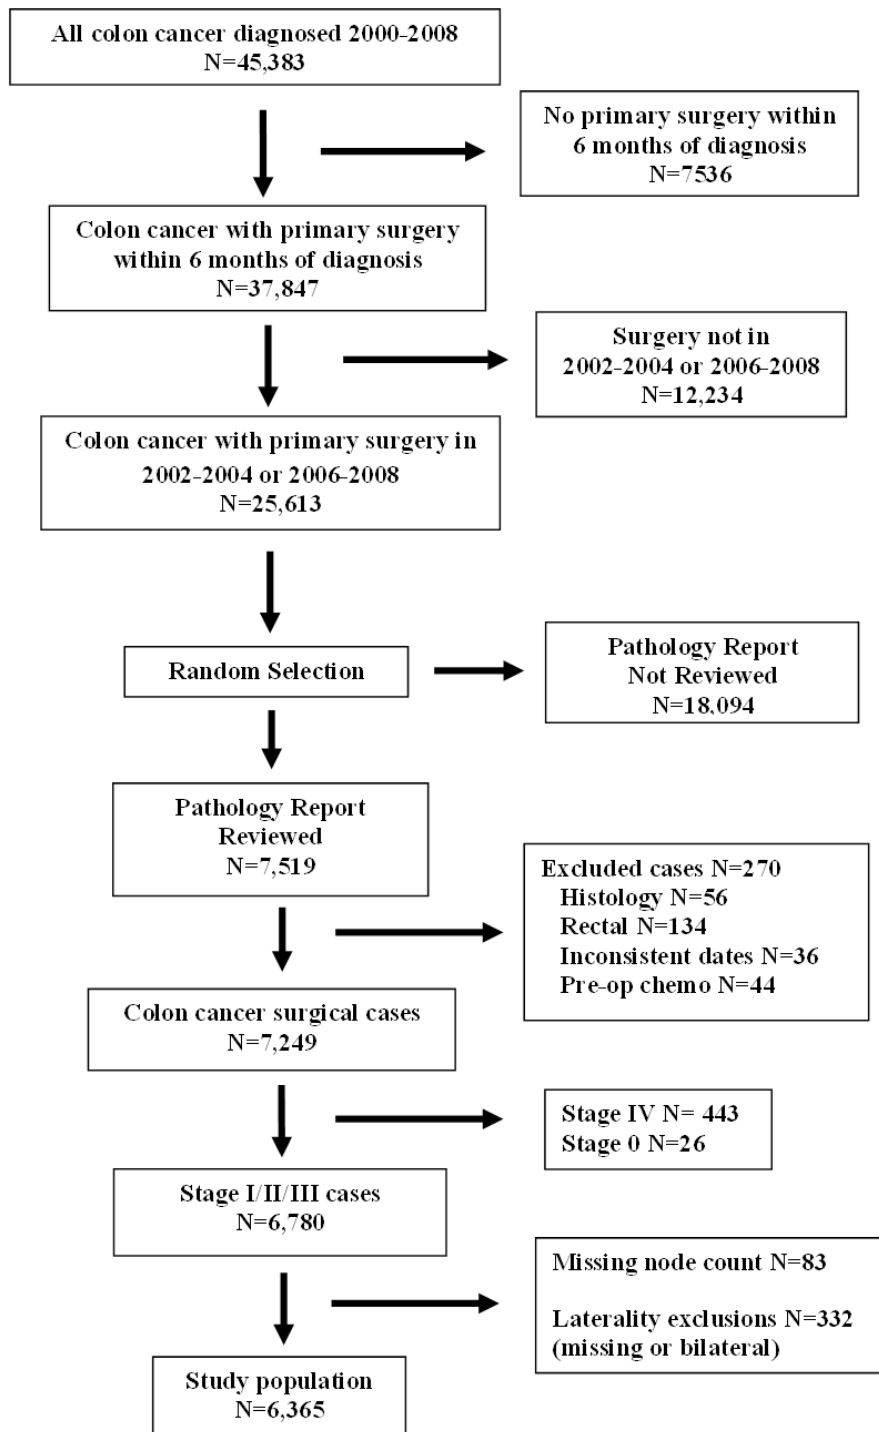

**eTable 1.** Patient-Level Factors Associated With Right-Sided Colon Cancer Among Patients With Early-Stage Disease Resected in Ontario During 2002-2008 (n=6365)

|                             |                      | <b>Right sidedness</b>            |                |
|-----------------------------|----------------------|-----------------------------------|----------------|
| <b>Co-Variate</b>           |                      | <b>Multivariate analysis</b>      |                |
|                             | <b>% Right sided</b> | <b>RR (95%CI)<sup>&amp;</sup></b> | <b>P-value</b> |
| <b>Patient-related</b>      |                      |                                   |                |
| Age, years                  |                      |                                   | <0.001         |
| <60                         | 43%                  | Ref                               |                |
| 60-69                       | 46%                  | 1.07 (0.98-1.16)                  |                |
| 70-79                       | 54%                  | 1.25 (1.15-1.35)                  |                |
| 80+                         | 61%                  | 1.34 (1.24-1.45)                  |                |
| Sex                         |                      |                                   | <0.001         |
| Male                        | 46%                  | Ref                               |                |
| Female                      | 58%                  | 1.24 (1.18-1.30)                  |                |
| Charlson co-morbidity score |                      |                                   | 0.001          |
| 0                           | 50%                  | Ref                               |                |
| 1+                          | 58%                  | 1.10 (1.04-1.15)                  |                |

<sup>&</sup>Log binomial regression was used to estimate relative risks

**eTable 2.** Factors Associated With Right-Sided Colon Cancer Among Patients With Stage III Disease Resected in Ontario During 2002-2008 (n=2756)

|                             |                      | <b>Right sidedness</b>            |                |
|-----------------------------|----------------------|-----------------------------------|----------------|
| <b>Co-Variate</b>           |                      | <b>Multivariate analysis</b>      |                |
|                             | <b>% Right-sided</b> | <b>RR (95%CI)<sup>&amp;</sup></b> | <b>P-value</b> |
| <b>Patient-related</b>      |                      |                                   |                |
| Age, years                  |                      |                                   | <0.001         |
| <60 (n=611)                 | 43%                  | Ref                               |                |
| 60-69 (n=702)               | 45%                  | 1.08 (0.96-1.22)                  |                |
| 70-79 (n=861)               | 52%                  | 1.19 (1.07-1.34)                  |                |
| 80+ (n=582)                 | 61%                  | 1.36 (1.21-1.52)                  |                |
| Sex                         |                      |                                   | <0.001         |
| Male (n=1443)               | 44%                  | Ref                               |                |
| Female (n=1313)             | 57%                  | 1.27 (1.18-1.37)                  |                |
| Charlson co-morbidity score |                      |                                   | 0.016          |
| 0 (n=2214)                  | 48%                  | Ref                               |                |
| 1+ (n=542)                  | 57%                  | 1.11 (1.02-1.21)                  |                |

<sup>&</sup>log binomial regression was used to estimate relative risks

**eTable 3.** Factors Associated With Survival Among Patients With Resected Colon Cancer Stage I in Ontario During 2002-2008 (n=1163)

| Co-Variate                     | Overall Survival |                       |         | Cancer-Specific Survival |                       |         |
|--------------------------------|------------------|-----------------------|---------|--------------------------|-----------------------|---------|
|                                | 5 year OS        | Multivariate analysis |         | 5 year CSS               | Multivariate analysis |         |
|                                |                  | HR (95%CI)            | P Trend |                          | HR (95%CI)            | P Trend |
| Age, years                     |                  |                       | <0.001  |                          |                       | <0.001  |
| <60                            | 95%              | Ref                   |         | 97%                      | Ref                   |         |
| 60-69                          | 92%              | 1.57 (0.83-2.97)      |         | 95%                      | 1.18 (0.47-2.96)      |         |
| 70-79                          | 80%              | 3.56 (2.00-6.35)      |         | 91%                      | 2.55 (1.13-5.75)      |         |
| 80+                            | 59%              | 9.25 (5.19-16.5)      |         | 83%                      | 5.37 (2.37-12.1)      |         |
| Sex                            |                  |                       | 0.034   |                          |                       | 0.010   |
| Male                           | 79%              | Ref                   |         | 90%                      | Ref                   |         |
| Female                         | 82%              | 0.78 (0.62-0.98)      |         | 93%                      | 0.58 (0.39-0.88)      |         |
| Socioeconomic status#          |                  |                       | 0.655   |                          |                       | 0.066   |
| Q1                             | 74%              | 1.22 (0.83-1.80)      |         | 86%                      | 2.04 (0.99-4.20)      |         |
| Q2                             | 81%              | 0.96 (0.65-1.42)      |         | 95%                      | 0.89 (0.40-1.95)      |         |
| Q3                             | 81%              | 1.03 (0.70-1.53)      |         | 91%                      | 1.42 (0.67-2.98)      |         |
| Q4                             | 83%              | 0.98 (0.65-1.49)      |         | 91%                      | 1.54 (0.72-3.31)      |         |
| Q5                             | 82%              | Ref                   |         | 93%                      | Ref                   |         |
| Charlson co-morbidity score    |                  |                       | <0.001  |                          |                       | 0.037   |
| 0                              | 86%              | Ref                   |         | 93%                      | Ref                   |         |
| 1+                             | 63%              | 2.50 (1.98-3.15)      |         | 86%                      | 1.57 (1.03-2.39)      |         |
| Lymphovascular invasion        |                  |                       | 0.388   |                          |                       | 0.889   |
| No                             | 81%              | Ref                   |         | 92%                      | Ref                   |         |
| Yes                            | 83%              | 0.72 (0.40-1.28)      |         | 92%                      | 1.18 (0.51-2.72)      |         |
| NA                             | 74%              | 1.15 (0.79-1.69)      |         | 88%                      | 1.11 (0.57-2.17)      |         |
| Grade**                        |                  |                       | 0.026   |                          |                       | 0.405   |
| Well-moderately differentiated | 80%              | Ref                   |         | 91%                      | Ref                   |         |
| Poorly differentiated          | 78%              | 1.69 (1.07-2.67)      |         | 90%                      | 1.43 (0.62-3.29)      |         |
| Laterality                     |                  |                       | 0.404   |                          |                       | 0.125   |
| Right                          | 78%              | 1.10 (0.88-1.39)      |         | 92%                      | 0.73 (0.48-1.09)      |         |
| Left                           | 82%              | Ref                   |         | 91%                      | Ref                   |         |

# Socioeconomic status quintile 1 represents the lowest socioeconomic status. SES data were not available for 6 patients.

\*\*Grade unstated for 31 patients

**eTable 4.** Factors Associated With Survival Among Patients With Resected Colon Cancer Stage II in Ontario During 2002-2008 (n=2446)

| Co-Variate                              | Overall Survival |                       |         | Cancer-Specific Survival |                       |         |
|-----------------------------------------|------------------|-----------------------|---------|--------------------------|-----------------------|---------|
|                                         | 5 year OS        | Multivariate analysis |         | 5 year CSS               | Multivariate analysis |         |
|                                         |                  | HR (95%CI)            | P Trend |                          | HR (95%CI)            | P Trend |
| Age, years                              |                  |                       | <0.001  |                          |                       | <0.001  |
| <60 (n=411)                             | 86%              | Ref                   |         | 88%                      | Ref                   |         |
| 60-69 (n=526)                           | 79%              | 1.34 (1.00-1.78)      |         | 84%                      | 1.21 (0.86-1.70)      |         |
| 70-79 (n=835)                           | 69%              | 2.24 (1.74-2.89)      |         | 78%                      | 1.63 (1.19-2.22)      |         |
| 80+ (n=674)                             | 54%              | 3.88 (2.98-5.05)      |         | 71%                      | 2.47 (1.78-3.43)      |         |
| Sex                                     |                  |                       | <0.001  |                          |                       | 0.001   |
| Male (n=1243)                           | 68%              | Ref                   |         | 78%                      | Ref                   |         |
| Female (n=1203)                         | 72%              | 0.72 (0.63-0.82)      |         | 81%                      | 0.72 (0.60-0.87)      |         |
| Socioeconomic status                    |                  |                       | 0.013   |                          |                       | 0.326   |
| Q1 (n=541)                              | 65%              | 1.20 (0.96-1.50)      |         | 76%                      | 1.12 (0.83-1.51)      |         |
| Q2 (n=576)                              | 66%              | 1.12 (0.90-1.40)      |         | 78%                      | 1.02 (0.76-1.38)      |         |
| Q3 (n=527)                              | 73%              | 0.90 (0.72-1.14)      |         | 82%                      | 0.86 (0.63-1.18)      |         |
| Q4 (n=434)                              | 74%              | 0.92 (0.72-1.17)      |         | 82%                      | 0.88 (0.64-1.22)      |         |
| Q5 (n=361)                              | 74%              | Ref                   |         | 80%                      | Ref                   |         |
| Charlson co-morbidity score             |                  |                       | <0.001  |                          |                       | 0.020   |
| 0 (n=1896)                              | 74%              | Ref                   |         | 81%                      | Ref                   |         |
| 1+ (n=550)                              | 54%              | 1.85 (1.61-2.12)      |         | 75%                      | 1.28 (1.04-1.59)      |         |
| Lymphovascular invasion                 |                  |                       | <0.001  |                          |                       | <0.001  |
| No (n=1920)                             | 72%              | Ref                   |         | 82%                      | Ref                   |         |
| Yes (n=343)                             | 56%              | 1.63 (1.37-1.94)      |         | 66%                      | 1.69 (1.34-2.12)      |         |
| NA (n=183)                              | 70%              | 1.16 (0.91-1.48)      |         | 81%                      | 1.21 (0.87-1.69)      |         |
| Tstage                                  |                  |                       | <0.001  |                          |                       | <0.001  |
| T3 (n=2044)                             | 72%              | Ref                   |         | 83%                      | Ref                   |         |
| T4 (n=402)                              | 56%              | 1.68 (1.43-1.98)      |         | 63%                      | 2.28 (1.85-2.80)      |         |
| Grade**                                 |                  |                       | 0.297   |                          |                       | 0.030   |
| Well-moderately differentiated (n=2081) | 70%              | Ref                   |         | 80%                      | Ref                   |         |
| Poorly differentiated (n=323)           | 64%              | 1.10 (0.92-1.32)      |         | 72%                      | 1.30 (1.03-1.66)      |         |
| Adjuvant chemotherapy                   |                  |                       | 0.421   |                          |                       | 0.625   |
| Yes (n=432)                             | 75%              | 0.92 (0.75-1.13)      |         | 79%                      | 1.07 (0.83-1.37)      |         |
| No (n=2014)                             | 69%              | Ref                   |         | 80%                      | Ref                   |         |
| Laterality                              |                  |                       | 0.101   |                          |                       | 0.052   |
| Right (n=1348)                          | 70%              | 0.89 (0.78-1.02)      |         | 81%                      | 0.83 (0.69-1.00)      |         |
| Left (n=1098)                           | 70%              | Ref                   |         | 78%                      | Ref                   |         |

# Socioeconomic status quintile 1 represents the lowest socioeconomic status. SES data were not available for 7 patients.

\*\*Grade unstated for 42 patients

**eTable 5.** Factors Associated With Survival Among Patients With Resected Colon Cancer Stage III in Ontario During 2002-2008 (n=2756)

| Co-Variate                              | Overall Survival |                       |         | Cancer-Specific Survival |                       |         |
|-----------------------------------------|------------------|-----------------------|---------|--------------------------|-----------------------|---------|
|                                         | 5 year OS        | Multivariate analysis |         | 5 year CSS               | Multivariate analysis |         |
|                                         |                  | HR (95%CI)            | P Trend |                          | HR (95%CI)            | P Trend |
| Age, years                              |                  |                       | <0.001  |                          |                       | 0.004   |
| <60 (n=611)                             | 60%              | Ref                   |         | 62%                      | Ref                   |         |
| 60-69 (n=702)                           | 53%              | 1.19 (1.02-1.40)      |         | 56%                      | 1.19 (1.00-1.42)      |         |
| 70-79 (n=861)                           | 44%              | 1.41 (1.21-1.64)      |         | 49%                      | 1.37 (1.15-1.62)      |         |
| 80+ (n=582)                             | 29%              | 1.69 (1.43-2.01)      |         | 42%                      | 1.31 (1.08-1.60)      |         |
| Sex                                     |                  |                       | 0.001   |                          |                       | 0.010   |
| Male (n=1443)                           | 46%              | Ref                   |         | 51%                      | Ref                   |         |
| Female (n=1313)                         | 47%              | 0.84 (0.76-0.93)      |         | 53%                      | 0.86 (0.76-0.96)      |         |
| Socioeconomic status                    |                  |                       | 0.232   |                          |                       | 0.190   |
| Q1 (n=582)                              | 45%              | 1.03 (0.87-1.22)      |         | 51%                      | 1.03 (0.84-1.25)      |         |
| Q2 (n=647)                              | 42%              | 1.16 (0.99-1.37)      |         | 48%                      | 1.19 (0.98-1.44)      |         |
| Q3 (n=588)                              | 48%              | 1.00 (0.84-1.18)      |         | 54%                      | 0.99 (0.82-1.21)      |         |
| Q4 (n=494)                              | 49%              | 1.08 (0.90-1.28)      |         | 53%                      | 1.11 (0.91-1.36)      |         |
| Q5 (n=439)                              | 52%              | Ref                   |         | 56%                      | Ref                   |         |
| Charlson co-morbidity score             |                  |                       | <0.001  |                          |                       | 0.381   |
| 0 (n=2214)                              | 50%              | Ref                   |         | 54%                      | Ref                   |         |
| 1+ (n=542)                              | 33%              | 1.29 (1.14-1.45)      |         | 43%                      | 1.07 (0.92-1.23)      |         |
| Lymphovascular invasion                 |                  |                       | <0.001  |                          |                       | <0.001  |
| No (n=1178)                             | 56%              | Ref                   |         | 63%                      | Ref                   |         |
| Yes (n=1363)                            | 40%              | 1.27 (1.14-1.42)      |         | 44%                      | 1.34 (1.18-1.53)      |         |
| NA (n=215)                              | 43%              | 1.32 (1.09-1.60)      |         | 47%                      | 1.45 (1.17-1.80)      |         |
| Tstage                                  |                  |                       | <0.001  |                          |                       | <0.001  |
| ≤T1 (n=42)                              | 71%              | Ref                   |         | 76%                      | Ref                   |         |
| T2 (n=171)                              | 75%              | 0.80 (0.43-1.49)      |         | 84%                      | 0.70 (0.30-1.60)      |         |
| T3 (n=1824)                             | 50%              | 1.46 (0.82-2.59)      |         | 55%                      | 1.83 (0.87-3.87)      |         |
| T4 (n=719)                              | 31%              | 2.28 (1.28-4.06)      |         | 35%                      | 3.09 (1.46-6.55)      |         |
| Nstage                                  |                  |                       | <0.001  |                          |                       | <0.001  |
| N1 (n=1629)                             | 55%              | Ref                   |         | 62%                      | Ref                   |         |
| N2 (n=1127)                             | 35%              | 1.65 (1.49-1.84)      |         | 38%                      | 1.93 (1.71-2.18)      |         |
| Grade**                                 |                  |                       | <0.001  |                          |                       | <0.001  |
| Well-moderately differentiated (n=2099) | 50%              | Ref                   |         | 56%                      | Ref                   |         |
| Poorly differentiated                   | 37%              | 1.26 (1.12-1.42)      |         | 39%                      | 1.35 (1.18-1.54)      |         |



|                       |     |                  |        |     |                  |        |
|-----------------------|-----|------------------|--------|-----|------------------|--------|
| (n=608)               |     |                  |        |     |                  |        |
| Adjuvant chemotherapy |     |                  | <0.001 |     |                  | <0.001 |
| Yes (n=1758)          | 58% | 0.45 (0.40-0.50) |        | 61% | 0.43 (0.38-0.49) |        |
| No (n=998)            | 27% | Ref              |        | 36% | Ref              |        |
| Laterality            |     |                  | 0.583  |     |                  | 0.139  |
| Right (n=1383)        | 43% | 1.03 (0.93-1.14) |        | 48% | 1.10 (0.97-1.24) |        |
| Left (n=1373)         | 51% | Ref              |        | 56% | Ref              |        |

# Socioeconomic status quintile 1 represents the lowest socioeconomic status. SES data were not available for 6 patients.

^ ≤T1 = pTX, or pT0, or pTis or pT1.

\*\*Grade unstated for 49 patients
